# Supplementary material for: Metabolomic Analysis of the Liver of a Dextran Sodium Sulfate-Induced Acute Colitis Mouse Model: Implications of the Gut–Liver Connection
Source: PubMed Central journal article supplement (PMC7072179; doi:10.3390/cells9020341), 2020-02-01
Supplement: cells-09-00341-s001.pdf [file cells-09-00341-s001.pdf]

1  
2 **Supplementary figure**

3

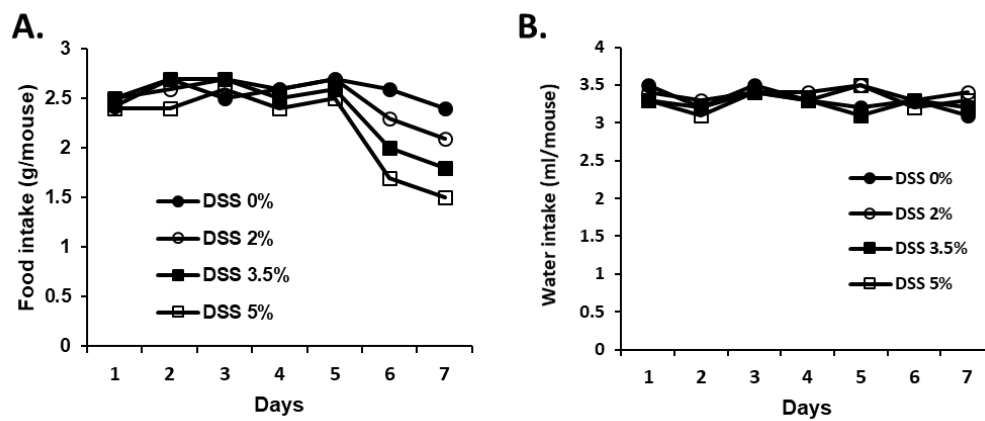

4

5 **Figure S1.** (A) Food intake and (B) water intake in DSS-treated mice. Mice were given 2, 3.5, 5% DSS  
6 in drinking water for 7 days. Each value is represented as mean  $\pm$  SD of 6 mice.
